# Supplementary material for: Improved adeno-associated virus (AAV) serotype 1 and 5 vectors for gene therapy
Source: PubMed Central journal article supplement — Sci Rep. 2013 May 13;6:1832. doi: 10.1038/srep01832 (PMC3652085; doi:10.1038/srep01832), 2013-05-13
Supplement: srep01832-s1.pdf [file srep01832-s1.pdf]

## **Improved adeno-associated virus (AAV) serotype 1 and 5 vectors for gene therapy**

Dwaipayan Sen<sup>1†</sup>, Balaji Balakrishnan<sup>1†</sup>, Nishanth Gabriel<sup>1</sup>, Prachi Agrawal<sup>2</sup>, Vaani Roshini<sup>1</sup>, Alok Srivastava<sup>1,2</sup>, Giridhara R. Jayandharan<sup>1,2\*</sup>

<sup>1</sup>Department of Hematology, <sup>2</sup>Centre for Stem Cell Research, Christian Medical College, Vellore, Tamil Nadu, India. † These authors contributed equally to this work.

### **SUPPLEMENTARY MATERIALS AND METHODS**

#### **Estimation of neutralizing antibodies against S/T mutant AAV5 vectors**

Heat inactivated serum samples from WT-AAV5 or S/T→A mutant AAV5 injected animals at a dose of  $5 \times 10^{10}$  vgs were assayed for the neutralizing antibody (NAb) titres as described previously<sup>20</sup> by the Immunology core at University of Pennsylvania. The NAb titer is reported as the highest plasma dilution that inhibited AAV transduction of Huh7 cells by 50% or more compared with that for the naive serum control.

#### **Histological studies**

Liver tissues from mock-injected or those injected with either WT-AAV5 or the best performing S/T→A mutant AAV5 vectors were collected 4 weeks post-injection, fixed in 10% buffered formalin and processed for microscopy. Three micron thick liver sections were cut and stained with hematoxylin and eosin. The degree of lobular and portal inflammation was scored (inflammation score, IS) by a pathologist, who was blinded to the experimental conditions. Inflammation scores were based on degree of lobular and portal inflammation and calculated based on the criteria, 0- no inflammation, 1- minimal inflammation, 2- mild inflammation, 3- moderate inflammation. Median score for each group (n=3) was calculated.

## **SUPPLEMENTARY FIGURE LEGENDS**

**Supplementary Figure S1. Schematic representation of the serine (S), threonine (T) and lysine (K) residues mutated in AAV1 and their conservation status across other AAV serotypes.** VP1 protein sequences from AAV serotypes 1 through 10 were aligned by ClustalW and the conservation status of the each of the target site for mutagenesis is shown in red.

**Supplementary Figure S2. Schematic representation of the serine (S), threonine (T) and lysine (K) residues mutated in AAV5 and their conservation status across other AAV serotypes.** VP1 protein sequences from AAV serotypes 1 through 10 were aligned by ClustalW and the conservation status of the each of the target site for mutagenesis is shown in red.

# Figure S1

| AAV1-<br>mutations | K137R | T251A | S277A | S499A | S526A | S663A | S669A |
|--------------------|-------|-------|-------|-------|-------|-------|-------|
| AAV1               | GAKT  | LPTY  | GYST  | NNSN  | ASHK  | FSAT  | FASF  |
| AAV2               | PVKT  | LPTY  | GYST  | NNSE  | ASHK  | FSAA  | FASF  |
| AAV3               | AGET  | LPTY  | GYST  | NNSN  | ASHK  | FSPA  | FASF  |
| AAV4               | GAKT  | LPTY  | GFST  | TGSD  | ATAG  | FSST  | VNSF  |
| AAV5               | GAKT  | LPSY  | GYST  | RASV  | MTNN  | FSDV  | VSSF  |
| AAV6               | GAKT  | LPTY  | GYST  | NNSN  | ASHK  | FSAT  | FASF  |
| AAV7               | GAKT  | LPTY  | GYST  | NNSN  | ATHK  | FTPA  | FASF  |
| AAV8               | GAKT  | LPTY  | GYST  | NNSN  | ATHK  | FNQS  | LNSF  |
| AAV9               | AAKT  | LPTY  | GYST  | NNSE  | ASHK  | FNKD  | LNSF  |
| AAV10              | GAKT  | LPTY  | GYST  | NNSN  | ATHK  | FSQA  | LASF  |

## Figure S2

| AAV-5 mutations | K32R | S268A | S485A | S652A | S658A | T107A | T328A |
|-----------------|------|-------|-------|-------|-------|-------|-------|
| AAV1            | PKAN | GYST  | NNSN  | FSAT  | FASF  | DTSF  | LTST  |
| AAV2            | PKPA | GYST  | NNSE  | FSAA  | FASF  | DTSF  | LTST  |
| AAV3            | PKAN | GYST  | NNSN  | FSPA  | FASF  | DTSF  | LTST  |
| AAV4            | PKAN | GFST  | TGSD  | FSSST | VNSF  | DTSF  | LTST  |
| AAV5            | PKPN | GYST  | RASV  | FSDV  | VSSF  | DTSF  | LTST  |
| AAV6            | PKAN | GYST  | NNSN  | FSAT  | FASF  | DTSF  | LTST  |
| AAV7            | PKAN | GYST  | NNSN  | FTPA  | FASF  | DTSF  | LTST  |
| AAV8            | PKAN | GYST  | NNSN  | FNQS  | LNSF  | DTSF  | LTST  |
| AAV9            | PKAN | GYST  | NNSE  | FNKD  | LNSF  | DTSF  | LTST  |
| AAV10           | PKAN | GYST  | NNSN  | FSQA  | LASF  | DTSF  | LTST  |

## **SUPPLEMENTARY TABLES**

**Supplementary Table S1.** Vector biodistribution in various organs in C57BL/6 mice 4-weeks after intravenous administration of WT or S/T/K mutant AAV5 vectors. Values are shown as mean ( $\pm$  SD) vector copy numbers per mouse diploid genome.

| <b>Vector</b> | <b>Muscle</b>             | <b>Lung</b>               | <b>Heart</b>                    | <b>Kidney</b>                 | <b>Spleen</b>                 |
|---------------|---------------------------|---------------------------|---------------------------------|-------------------------------|-------------------------------|
| WT-AAV5       | 0.0015<br>( $\pm$ 0.0001) | 0.0082<br>( $\pm$ 0.001)  | 0.0005<br>( $\pm$ 0.0001)       | 0.0003<br>( $\pm$ 0.00008)    | 0.000081<br>( $\pm$ 0.000009) |
| S268A         | 0.0005<br>( $\pm$ 0.0015) | 0.02335<br>( $\pm$ 0.009) | 0.0031<br>( $\pm$ 0.0009)       | 0.000086<br>( $\pm$ 0.00001)  | 0.00003<br>( $\pm$ 0.00001)   |
| S485A         | 0.0092<br>( $\pm$ 0.0007) | 0.2934<br>( $\pm$ 0.02)   | 0.00201<br>( $\pm$ 0.001)       | 0.000072<br>( $\pm$ 0.00002)  | 0.000173<br>( $\pm$ 0.00006)  |
| S652A         | 0.0037<br>( $\pm$ 0.015)  | 0.1045<br>( $\pm$ 0.09)   | 0.00055<br>( $\pm$ 0.00001)     | 0.00052<br>( $\pm$ 0.0001)    | 0.000216<br>( $\pm$ 0.00008)  |
| S658A         | 0.0096<br>( $\pm$ 0.012)  | 0.1559<br>( $\pm$ 0.04)   | 0.0000954<br>( $\pm$ 0.0000003) | 0.00055<br>( $\pm$ 0.0003)    | 0.000741<br>( $\pm$ 0.00006)  |
| T107A         | 0.0043<br>( $\pm$ 0.0003) | 0.049<br>( $\pm$ 0.008)   | 0.000818<br>( $\pm$ 0.00007)    | 0.000015<br>( $\pm$ 0.000009) | 0.00021<br>( $\pm$ 0.00003)   |
| T328A         | 0.0145<br>( $\pm$ 0.007)  | 0.187 ( $\pm$ 0.03)       | 0.0002<br>( $\pm$ 0.00005)      | 0.00058<br>( $\pm$ 0.0001)    | 0.00006<br>( $\pm$ 0.000009)  |
| K32R          | 0.00039<br>( $\pm$ 0.001) | 0.05415<br>( $\pm$ 0.009) | 0.0002<br>( $\pm$ 0.00008)      | 0.0011<br>( $\pm$ 0.0004)     | 0.0001<br>( $\pm$ 0.00008)    |

**Supplementary Table S2: Neutralization antibody formation against wild type or mutant AAV5 vectors:** Pooled serum samples from WT-AAV5 or S/T-AAV5 mutant injected mice (n=4 per group) 4-weeks after vector administration was analyzed. Heat inactivated serum samples were assayed for the neutralizing antibody (NAb) titers as described in the 'Supplementary Materials and Methods'. The NAb titer is reported as the highest plasma dilution that inhibited AAV5 transduction of Huh7 cells by 50% or more compared with that for the naive serum control. Limit of detection of the assay was 1/5 dilution.

| <b>Vector</b>                  | <b>Reciprocal NAb titer</b> |
|--------------------------------|-----------------------------|
| Mock                           | <5                          |
| WT-AAV5                        | 5120                        |
| S268A                          | 5120                        |
| S652A                          | 5120                        |
| S658A                          | 5120                        |
| T107A                          | 5120                        |
| Anti-AAV5 rabbit serum control | 40960                       |

**Supplementary Table S3.** Histological scores of liver samples obtained from C57BL/6 mice (n=4) four weeks post-injection with WT-AAV5 or mutant AAV5 vectors.

| <b>Injected Vector</b> | <b>Median inflammation score</b> |
|------------------------|----------------------------------|
| Mock                   | 0.5 (0-1)                        |
| WT-AAV5                | 0 (0) (0)                        |
| S268A-AAV5             | 0(0-1)                           |
| S652A-AAV5             | 0.5(0-1)                         |
| S658A-AAV5             | 0(0)                             |
| T107A-AAV5             | 0.5(0-1)                         |

**Supplementary Table S4:** Details of primers used for site-directed mutagenesis of specific Serine/threonine to Alanine and Lysine to Arginine residues in AAV1 capsid

| RESIDUE    | SEQUENCE ( 5' to 3')                                                                                                                                    | NUCLEOTIDE CHANGE | CHANGE IN RESTRICTION ENZYME |
|------------|---------------------------------------------------------------------------------------------------------------------------------------------------------|-------------------|------------------------------|
| AAV1-S277A | Wild Type Primer Sequence:-<br>CAACCACTACTTCGGCTACAGCACCCCCTGGGGGTATTTTG<br><br>Mutant Primer Sequence:-<br>CAACCACTACTTCGGCTACGCCACCCCATGGGGGTATTTTG   | AGC→GCC           | C→A NcoI appears             |
| AAV1-S499A | Wild Type Primer Sequence:-<br>CAAAAACAGACAACAACAACAGCAATTTTACCTGGACTGGTG<br><br>Mutant Primer Sequence:-<br>CAAAAACAGACAACAACAACGCCAATTTTACCTGGACTGGTG | AGC →GCC          | No silent mutation           |
| AAV1-S526A | Wild Type Primer Sequence:-<br>GCACTGCTATGGCCTCACACAAAGACGAC<br><br>Mutant Primer Sequence:-<br>GCACTGCCATGGCCGCACACAAAGACGAC                           | TCA→GCA           | T→C NcoI appears             |
| AAV1-S663A | Wild Type Primer Sequence:-<br>CGAATCCTCCGCGGAGTTTTCAGCTACAAAGTTTGCTTC<br><br>Mutant Primer Sequence:-<br>CGAATCCTCCGCGGAGTTTGCAGCTACAAAGTTTGCTTC       | TCA→GCA           | G→C SacII appears            |
| AAV1-S669A | Wild Type Primer Sequence:-<br>TTTCAGCTACAAAGTTTGCTTCA TTCATCACCCAATACTCC<br><br>Mutant Primer Sequence:-<br>TTTCAGCTACAAAGTTTGCTGCA TTCATCACCCAATACTCC | TCA →GCA          | BsmI appears                 |
| AAV1-T251A | Wild Type Primer Sequence:-<br>CCTGGCCTTGCCACCTACAATAACCACC<br><br>Mutant Primer Sequence:-<br>CCTGGCCTTGCCGCCCTACAATAACCACC                            | ACC→GCC           | C→G NaeI appears             |
| AAV1-K137R | Wild Type Primer Sequence:-<br>CTGGTTGAGGAAGGCGCTAAGACGGCTCCTGGAAAGAAAC<br><br>Mutant Primer Sequence:-<br>CTGGTTGAGGAAGGCGGAGAACGGCTCCTGGAAAGAAAC      | AAG→AGA           | T→G, BpII appears            |



**Supplementary Table S5:** Details of primers used for site-directed mutagenesis of specific Serine/threonine to Alanine and Lysine to Arginine residues in AAV5 capsid.

| RESIDUE    | SEQUENCE ( 5' to 3')                                                                                                                     | NUCLEOTIDE CHANGE | CHANGE IN RESTRICTION ENZYME |
|------------|------------------------------------------------------------------------------------------------------------------------------------------|-------------------|------------------------------|
| AAV5-S268A | Wild Type Primer Sequence:-<br>AACGCCTACTTTGGATACAGCACCCCCTGGGGGTAC<br><br>Mutant Primer Sequence:-<br>GCCTACTTTGGATACGCCACCCCCTGGGGG    | AGC->GCC          | No silent mutations          |
| AAV5-S485A | Wild Type Primer Sequence:-<br>CGGGGTCAACCGCGCCAGTGTGTCAGCGCCTTCGCC<br><br>Mutant Primer Sequence:-<br>GGTCAACCGCGCCGCTGTGTCAGCGCCTTC    | AGT->GCT          | TSPR I disappears            |
| AAV5-S652A | Wild Type Primer Sequence:-<br>GAAATATCACCAGCTTCTCGGACGTGCCCGTCAGC<br><br>Mutant Primer Sequence:-<br>ATATCACCAGCTTCGCGGACGTGCCCGTC      | TCG ->GCG         | HPYI 88I disappears          |
| AAV5-S658A | Wild Type Primer Sequence:-<br>TCGGACGTGCCCGTCAGCAGCTTCATCACCCAGTACAG<br><br>Mutant Primer Sequence:-<br>GACGTGCCCGTCAGCGCTTCATCACCCAGTA | AGC ->GCC         | ALU I disappears             |
| AAV5-K32R  | Wild Type Primer Sequence:-<br>AAGCGGGCCCACCGAAACCAAAACCAATCAGCAG<br><br>Mutant Primer Sequence:-<br>CGGGCCCACCGAAACCAAGACCAATCAG        | AAA->AGA          | No silent mutation           |
| AAV5-T107A | Wild Type Primer Sequence:-<br>AAGCTCGCCGACGACACATCCTTCGGGGAA<br><br>Mutant Primer Sequence:-<br>CTCGCCGACGACGCATCCTTCGGGG               | ACA->GCA          | MWO I appears                |
| AAV5-T328A | Wild Type Primer Sequence:-<br>CGCCAACAACCTCACCTCCACCGTCCAAGT<br><br>Mutant Primer Sequence:-<br>CGCCAACAACCTCGCTCCACCGTCCA              | ACC->GCC          | HPH I disappears             |
